# Supplementary material for: Flexible Pd/CeO2–TiO2 nanofibrous membrane with high efficiency ultrafine particulate filtration and improved CO catalytic oxidation performance
Source: Royal Society of Chemistry journal article supplement (doi:10.1039/c5ra09198e), 2015-01-01

## Electronic Supplementary Information for

# Flexible Pd/CeO<sub>2</sub>-TiO<sub>2</sub> nanofibrous membrane with high efficient ultrafine particulate filtration and improved CO catalytic oxidation performance

Wei Li, Yan Wang, Botao Ji, Xiuling Jiao\* and Dairong Chen\*

*School of Chemistry & Chemical Engineering, National Engineering Research Center for Colloidal*

*Materials, Shandong University, Jinan 250100, PR China*

*E-mail: [jiaoxl@sdu.edu.cn](mailto:jiaoxl@sdu.edu.cn), [cdr@sdu.edu.cn](mailto:cdr@sdu.edu.cn)*

**Fig. S1** XRD patterns (a), FT-IR spectra (b) of the xerogel fibrous membranes and those calcined at 500 °C.

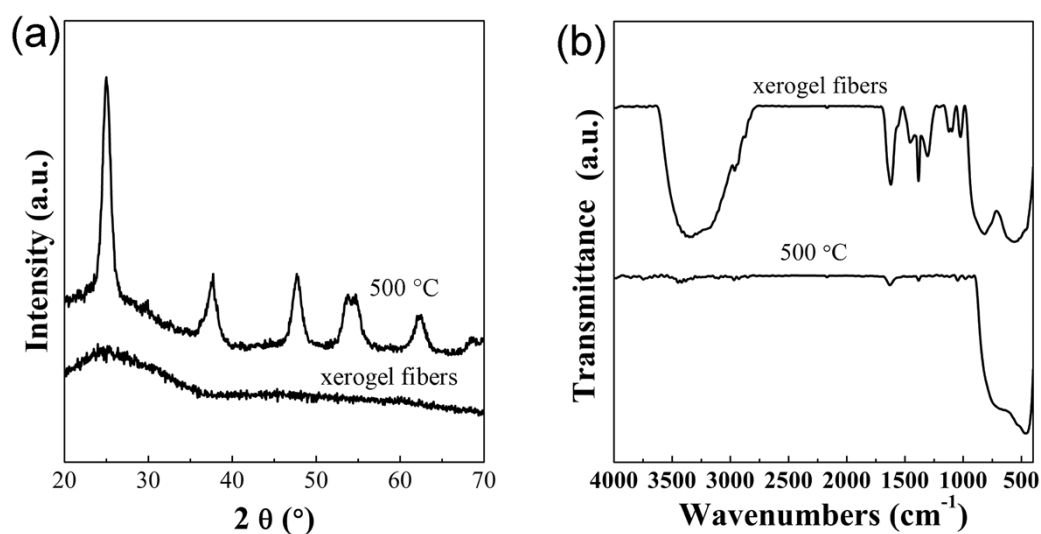

**Fig. S2** FE-SEM images of TiO<sub>2</sub> (a), TC01 (b), TC05 (c), and TC10 (d) samples being calcined at 500 °C. (e), (f), (g), and (h) are the corresponding high resolution SEM images.

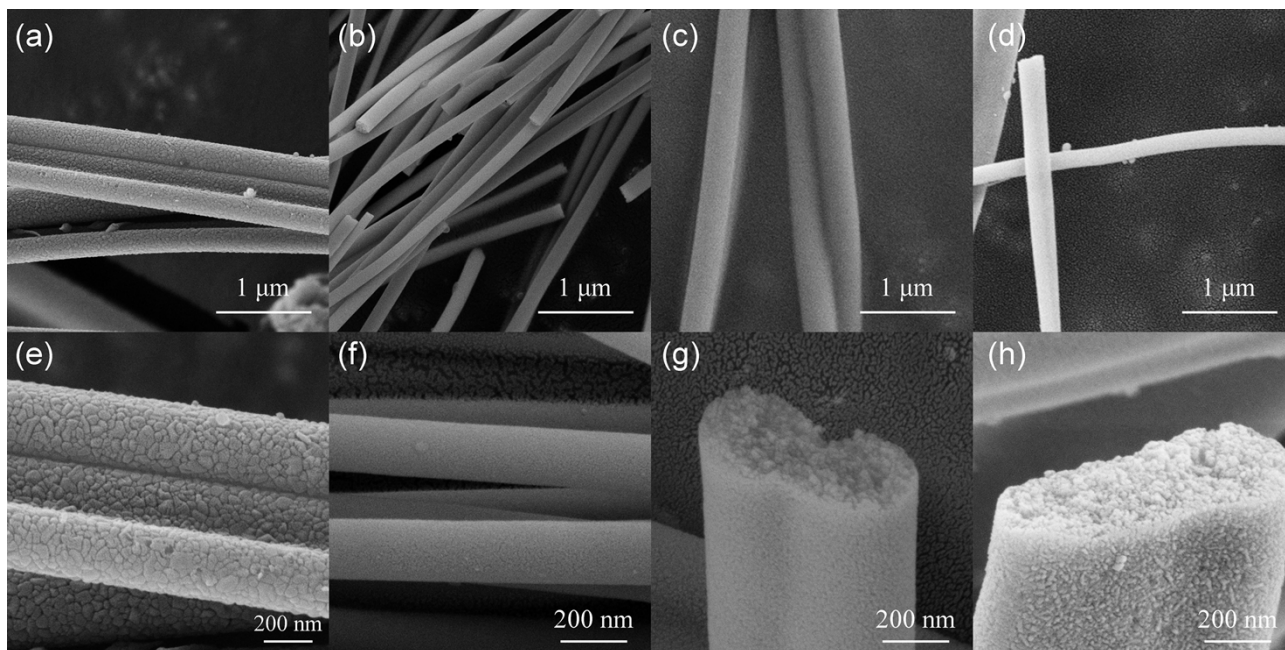

**Fig. S3** N<sub>2</sub> adsorption-desorption isotherms (a) and pore size distributions (b) of TiO<sub>2</sub>, TC01, TC05, and TC10 samples.

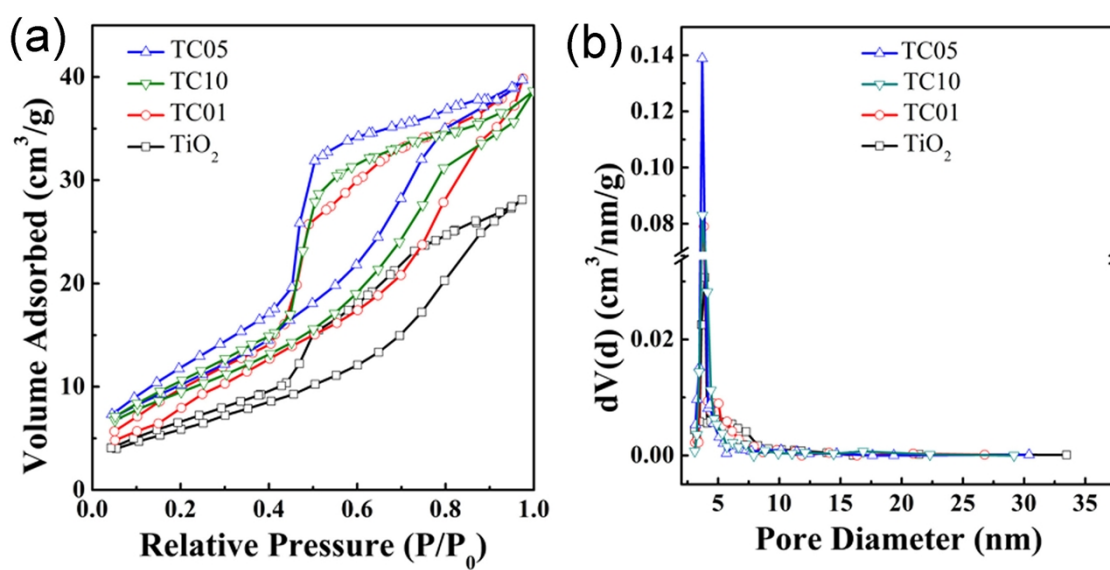

**Fig. S4** X-ray energy dispersive spectrometry (EDS) (a) and corresponding elemental mapping (b) of TC05.

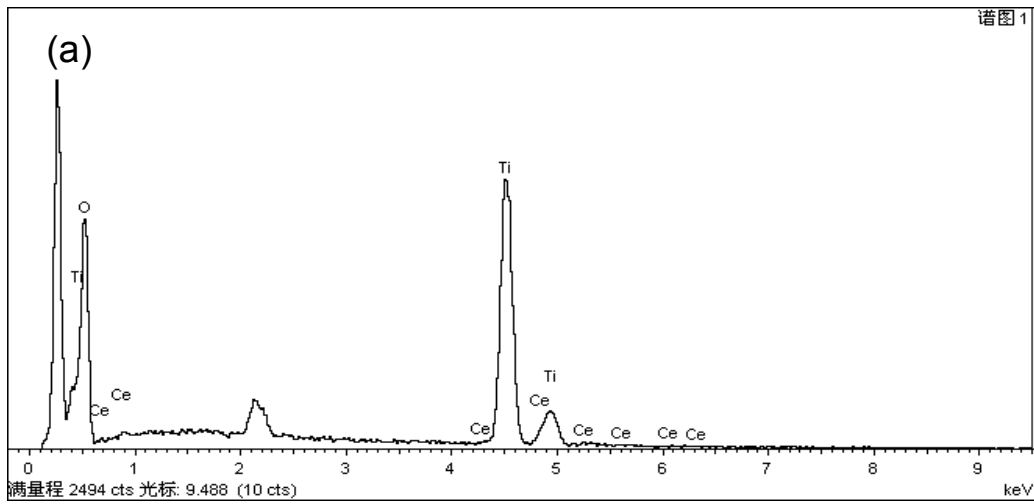

| Element | Weight<br>Precent(%) | Atom<br>Precent (%) |
|---------|----------------------|---------------------|
| O K     | 55.67                | 79.69               |
| Ti K    | 41.52                | 19.85               |
| Ce L    | 2.81                 | 0.46                |
| Total   | 100.00               |                     |

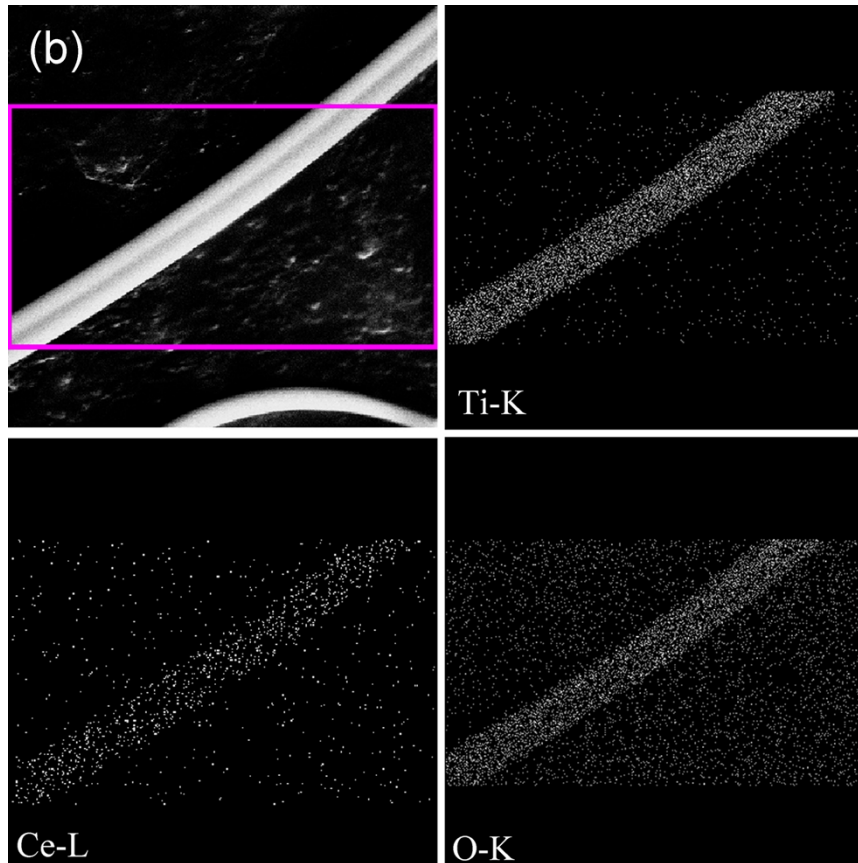

**Fig. S5** TEM image (a), SEM images (b, c) XRD patterns (d) and optical image of Pd/TC05 sample calcined at 500 °C. XPS spectrum (f) of Pd in the Pd/TC05 nanofibers.

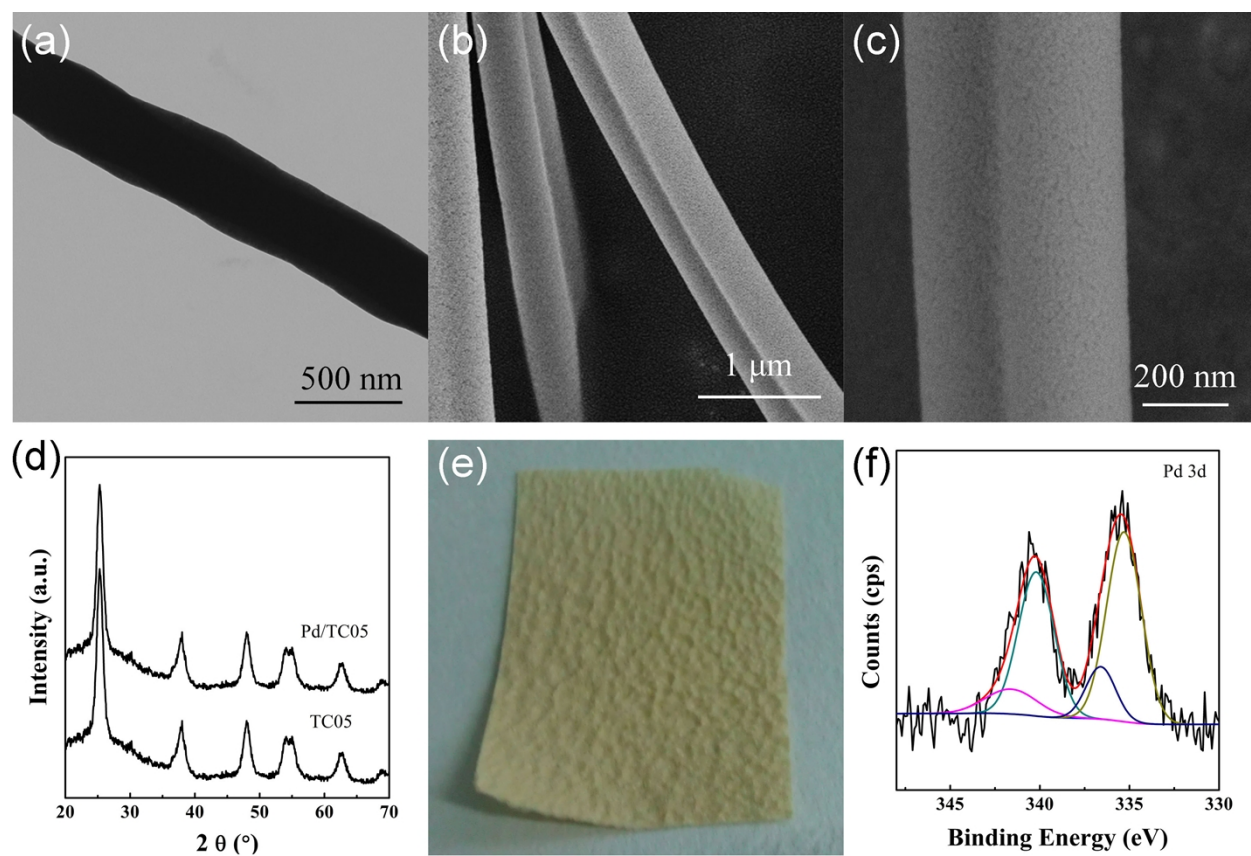

Supplement: c5ra09198e1.pdf [file c5ra09198e1.pdf]
